# Supplementary material for: A multivariate multi-step LSTM forecasting model for tuberculosis incidence with model explanation in Liaoning Province, China
Source: Springer Nature journal article supplement (doi:10.1186/s12879-022-07462-8), 2022-05-23
Supplement: MOESM4 [file 22766760]

## **A multivariate multi-step LSTM forecasting model for tuberculosis incidence with model explanation in Liaoning Province, China**

Enbin Yang<sup>1,2</sup>, Hao Zhang<sup>1,2,3</sup>, Xinsheng Guo<sup>1,2</sup>, Zinan Zang<sup>1,2</sup>, Zhen Liu<sup>1,4</sup>, Yuanning Liu<sup>1,2,3\*</sup>

<sup>1</sup>College of Computer Science and Technology, Jilin University, 130012, Changchun, China.

<sup>2</sup>Key Laboratory of Symbolic Computation and Knowledge Engineering of Ministry of Education, Jilin University, 130012, Changchun, China.

<sup>3</sup>College of Software, Jilin University, 130012, Changchun, China.

<sup>4</sup>Graduate School of Engineering, Nagasaki Institute of Applied Science, 536 Aba-machi, 851-0193, Nagasaki, Japan.

\*Correspondence: [liuyn@jlu.edu.cn](mailto:liuyn@jlu.edu.cn)

### **List and Introduction of Additional Files**

1. Supplementary Information: this word document includes an introduction to the full names of the factors, as well as additional figures of the model solution.
2. Complete data after processing: the data set used for the prediction model in this paper.
3. Raw meteorological data: 15 sets of raw meteorological data were obtained from seven monitoring stations.
4. Raw economic and social data: 9 sets of raw economic and social data.

When we solved the model, all the factors were given a variable name to simply express the meaning of the factors, as in **Supplementary Table T1**. Among them, each meteorological data was taken from seven meteorological monitoring stations in Liaoning province, which are Changwu, Chaoyang, Shenyang, Benxi, Yingkou, Dandong, and Dalian. The additional files "*raw\_economic\_and\_social\_data.xls*" and "*raw\_meteorological\_data.xls*" store the raw values of all the factor data. values for all factors, however, there are many missing values.

We gave complete results for all models, including the ARIMA model (**Supplementary Table T2**), SARIMA model (**Supplementary Table T3**), multivariate multi-step LSTM model (**Supplementary Table T4**), and multi-step ARIMA-LSTM hybrid model (**Supplementary Table T5**). These findings may be helpful in tuning the model parameters.

**Supplementary Table T1** Variable names and factor names

| <b>Factor Category</b>          | <b>Variable Name</b>   | <b>Factor Name (unit)</b>                                                                       |
|---------------------------------|------------------------|-------------------------------------------------------------------------------------------------|
| <b>Meteorological data</b>      | avr_air_pressure       | Average air pressure (hPa)                                                                      |
|                                 | avr_wind_spd           | Average 2-minute wind speed (m/s)                                                               |
|                                 | avr_temp               | Average temperature (°C)                                                                        |
|                                 | avr_water_pressure     | Average water pressure (hPa)                                                                    |
|                                 | rel_humidity           | Average relative humidity (%)                                                                   |
|                                 | day_precipitation      | Number of days with daily precipitation $\geq 0.1$ mm (days)                                    |
|                                 | month_sun              | Monthly sunshine percentage (%)                                                                 |
|                                 | hour_sun               | Sunshine hours (h)                                                                              |
|                                 | extreme_wind_speed     | Extreme wind speed (m/s)                                                                        |
|                                 | min_air_pressure       | Minimum air pressure (hPa)                                                                      |
|                                 | min_temp               | Minimum temperature (°C)                                                                        |
|                                 | max_air_pressure       | Maximum air pressure (hPa)                                                                      |
|                                 | max_temp               | Maximum temperature (°C)                                                                        |
|                                 | max_wind_speed         | Maximum wind speed (m/s)                                                                        |
|                                 | day_max_precipitation  | Maximum daily precipitation (mm)                                                                |
| <b>Economic and social data</b> | power                  | Electricity generation (billion kWh)                                                            |
|                                 | industrial_add         | Value added of industries above the scale (Year-on-year growth %)                               |
|                                 | sales_rate             | Industrial product sales rate (%)                                                               |
|                                 | fin_budget             | Local budget revenue (cumulative growth %)                                                      |
|                                 | cpi_rural              | Rural Consumer Price Index                                                                      |
|                                 | cpi_urban              | Urban Consumer Price Index                                                                      |
|                                 | cpi                    | Average Consumer Price Index                                                                    |
|                                 | pas_turn_road          | Road passenger turnover                                                                         |
|                                 | pas_turn_water         | Waterway passenger turnover                                                                     |
|                                 | pas_turn               | Average passenger turnover                                                                      |
|                                 | im_ex                  | Total value of imports and exports to and from domestic destinations/sources (thousands of USD) |
|                                 | residential_investment | Residential investment volume (Cumulative year-on-year %)                                       |
|                                 | ex_factory_index       | Ex-factory price index of industrial products                                                   |

Supplementary Table T2 Prediction performance of the ARIMA models

| $(p, d, q)$ | Ahead Size | RMSE   | MAE    | MAPE (%) | sMAPE (%) |
|-------------|------------|--------|--------|----------|-----------|
| (5, 1, 5)   | 6          | 0.3736 | 0.2865 | 6.2383   | 5.9174    |
| (3, 1, 3)   |            | 1.1175 | 0.9241 | 20.1837  | 17.7453   |
| (2, 1, 4)   |            | 0.3244 | 0.2811 | 6.0454   | 5.8097    |
| (2, 1, 1)   |            | 0.5164 | 0.4724 | 10.0354  | 10.4617   |
| (3, 1, 5)   |            | 0.7241 | 0.5659 | 12.3576  | 11.2302   |
| (5, 1, 5)   | 12         | 0.5300 | 0.4398 | 10.8737  | 10.0603   |
| (3, 1, 3)   |            | 1.3026 | 1.1277 | 26.9630  | 22.9895   |
| (2, 1, 4)   |            | 0.4425 | 0.3917 | 9.7674   | 6.0454    |
| (2, 1, 1)   |            | 0.5250 | 0.4692 | 11.1693  | 11.7354   |
| (3, 1, 5)   |            | 0.9007 | 0.7648 | 18.4558  | 16.3897   |
| (5, 1, 5)   | 24         | 0.5628 | 0.4724 | 11.1506  | 10.3224   |
| (3, 1, 3)   |            | 1.3423 | 1.1488 | 26.5904  | 22.5749   |
| (2, 1, 4)   |            | 0.4672 | 0.4177 | 9.9328   | 9.3198    |
| (2, 1, 1)   |            | 0.8994 | 0.7413 | 16.9383  | 19.3824   |
| (3, 1, 5)   |            | 0.9290 | 0.7617 | 17.8239  | 15.7419   |

**Supplementary Table T3** Prediction performance of the SARIMA models

| $(p, d, q) \times (P, D, Q)_{12}$ | Ahead Size | RMSE   | MAE    | MAPE (%) | sMAPE (%) |
|-----------------------------------|------------|--------|--------|----------|-----------|
| $(0, 1, 1) \times (0, 1, 1)_{12}$ | 6          | 1.0935 | 1.0289 | 22.0253  | 19.5980   |
| $(1, 1, 1) \times (0, 1, 1)_{12}$ |            | 1.0157 | 0.9339 | 20.0035  | 17.9006   |
| $(0, 1, 2) \times (0, 1, 1)_{12}$ |            | 1.0287 | 0.9493 | 20.3302  | 18.1746   |
| $(0, 1, 1) \times (1, 1, 1)_{12}$ |            | 1.0625 | 0.9988 | 21.3799  | 19.0798   |
| $(1, 1, 2) \times (0, 1, 1)_{12}$ |            | 1.0963 | 1.0265 | 21.9627  | 19.5315   |
| $(0, 1, 1) \times (0, 1, 1)_{12}$ | 12         | 0.8587 | 0.7368 | 16.5854  | 14.9808   |
| $(1, 1, 1) \times (0, 1, 1)_{12}$ |            | 0.7825 | 0.6508 | 14.5400  | 13.2301   |
| $(0, 1, 2) \times (0, 1, 1)_{12}$ |            | 0.7955 | 0.6651 | 14.8807  | 13.5211   |
| $(0, 1, 1) \times (1, 1, 1)_{12}$ |            | 0.8354 | 0.7182 | 16.1828  | 14.6582   |
| $(1, 1, 2) \times (0, 1, 1)_{12}$ |            | 0.8447 | 0.7109 | 15.8715  | 14.3506   |
| $(0, 1, 1) \times (0, 1, 1)_{12}$ | 24         | 0.8471 | 0.7204 | 15.9791  | 14.5258   |
| $(1, 1, 1) \times (0, 1, 1)_{12}$ |            | 0.7634 | 0.6384 | 14.1518  | 13.0495   |
| $(0, 1, 2) \times (0, 1, 1)_{12}$ |            | 0.7778 | 0.6519 | 14.4502  | 13.2851   |
| $(0, 1, 1) \times (1, 1, 1)_{12}$ |            | 0.8323 | 0.7083 | 15.7193  | 14.3164   |
| $(1, 1, 2) \times (0, 1, 1)_{12}$ |            | 0.8040 | 0.6764 | 14.9867  | 13.7548   |

**Supplementary Table T4** Prediction performance of multivariate multi-step LSTM models (17 factors)

| Step Size ( $n$ ) | Ahead Size | RMSE   | MAE    | MAPE (%) | sMAPE (%) |
|-------------------|------------|--------|--------|----------|-----------|
| 1                 | 6          | 0.3296 | 0.2959 | 6.3009   | 6.2957    |
| 2                 |            | 0.2825 | 0.2363 | 5.0797   | 4.9490    |
| 3                 |            | 0.3713 | 0.3310 | 7.0924   | 6.7762    |
| 4                 |            | 0.4272 | 0.3753 | 7.9774   | 7.5864    |
| 1                 | 12         | 0.4614 | 0.3488 | 8.8951   | 8.3512    |
| 2                 |            | 0.4060 | 0.3073 | 7.8076   | 7.5203    |
| 3                 |            | 0.4838 | 0.3758 | 9.4591   | 8.7572    |
| 4                 |            | 0.4617 | 0.3740 | 9.1130   | 8.7787    |
| 1                 | 24         | 0.4499 | 0.3398 | 8.3577   | 7.9290    |
| 2                 |            | 0.4108 | 0.3295 | 7.7436   | 7.4895    |
| 3                 |            | 0.4632 | 0.3671 | 8.7567   | 8.2718    |
| 4                 |            | 0.5297 | 0.4306 | 9.9386   | 9.7692    |

**Supplementary Table T5** Prediction performance of multi-step ARIMA-LSTM hybrid models

| Step Size ( $n$ ) | Ahead Size | RMSE   | MAE    | MAPE (%) | sMAPE (%) |
|-------------------|------------|--------|--------|----------|-----------|
| 1                 | 6          | 0.5716 | 0.4063 | 8.6308   | 9.4558    |
| 2                 |            | 0.5850 | 0.4444 | 9.3583   | 10.1987   |
| 3                 |            | 0.4659 | 0.3206 | 6.8661   | 7.4156    |
| 4                 |            | 0.4731 | 0.3627 | 7.7163   | 8.2338    |
| 1                 | 12         | 0.4423 | 0.2996 | 6.9118   | 7.3411    |
| 2                 |            | 0.4438 | 0.3081 | 6.9633   | 7.4099    |
| 3                 |            | 0.3753 | 0.2619 | 6.1742   | 6.4240    |
| 4                 |            | 0.3913 | 0.2868 | 6.7508   | 6.9308    |
| 1                 | 24         | 0.4508 | 0.3352 | 7.5220   | 7.8815    |
| 2                 |            | 0.4787 | 0.3489 | 7.7385   | 8.1999    |
| 3                 |            | 0.4042 | 0.3070 | 6.9664   | 7.2245    |
| 4                 |            | 0.4208 | 0.3254 | 7.3678   | 7.6021    |

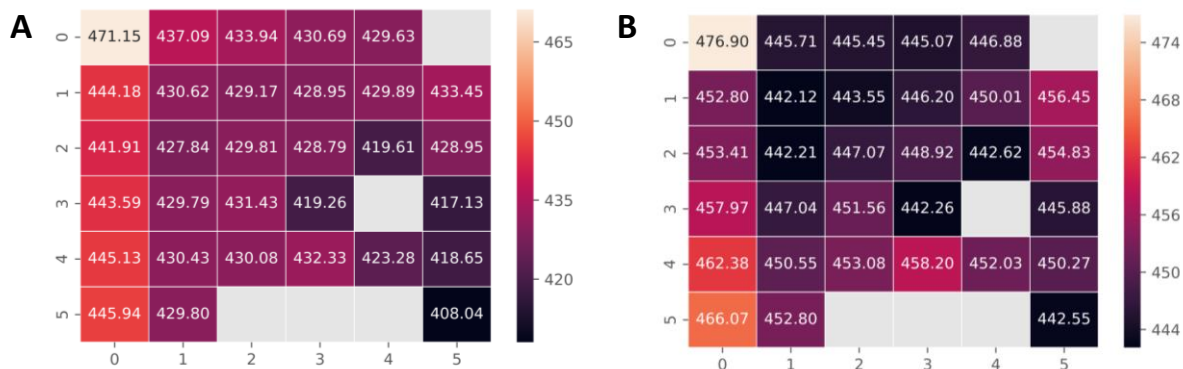

Supplementary Figure S1 AIC and BIC heat maps of the ARIMA model

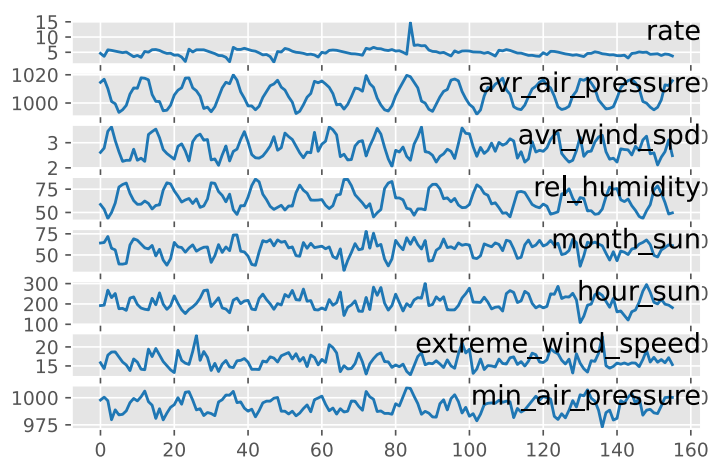

Supplementary Figure S2 Relationship between morbidity and various factors
