# Supplementary material for: A multivariate multi-step LSTM forecasting model for tuberculosis incidence with model explanation in Liaoning Province, China
Source: BMC Infect Dis. 2022 May 23;22:490. doi: 10.1186/s12879-022-07462-8 (PMC9128107; doi:10.1186/s12879-022-07462-8)
Supplement: Supplementary file 2 — Additional file 2. Economic and social factors (raw data). [file 12879_2022_7462_MOESM2_ESM.xls]

## Sheet: raw_economic_and_social_data
Year	Month	power	industrial_add	sales_rate	fin_budget	cpi_rural	cpi_urban	pas_turn_road	pas_turn_water	im_ex	residential_investment	ex_factory_index
2005	1	69.21	33.8	95.75	43.6	104.2	100.9	161622		3160980		107.13
2005	2	64.45	18.1	96.38	49.3	104.8	102	183315	6063	2959660	51	105.81
2005	3	74.39	29.7	98.46	27.8	104	101.5	163198	5363	4583577	5.2	105.73
2005	4	69.38	25.1	98.15	22.9	103.3	100.8	173058	5314	4464550	6.6	105.86
2005	5	71.67	24.1	97.64	23.3	104.1	100.8	181422	7179	3772627	1.3	106.17
2005	6	68	19.9	98.29	22.3	104.1	100.4	168545	5706	4197710	10.8	105.85
2005	7	69.19	22.2	99.28	22.2	104.6	100.9	168917	9807	4129866	13.6	105.22
2005	8	78.99	15.6	98.54	22.2	104.7	100.9	179941	9995	4101492	16.1	105.39
2005	9	70.81	19.2	96.23	28.4	104.5	100.3	177614	7098	3995620	18.6	104.8
2005	10	73.81	15	98.36	26.8	104.1	100	188593	6869	3473782	18.7	104.03
2005	11	76.04	19	97.64	27.1	103.6	100.2	174994	7713	3795022	25.6	103
2005	12	90.59	17.5	100.16	22.7	102.2	100.5			4418001	27.8	102.7
2006	1	80.17	18.9		7.2	102.48	100.87	193232	6337	3286785		104.48
2006	2	77.11	18.2	96.66	14.8	102.53	101.92	191186	7653	2925048	14.8	103.27
2006	3	86.9	18.4	97.04	22.2	102.25	101.11	190692	5808	4327488	49.2	103.31
2006	4	77.62	15.3	97.92	22.4	102.12	101.29	194450	5363	4285696	57	103.57
2006	5	82.92	19.5	96.98	15.8	101.42	101.02	217858	7541	4447897	45	103.18
2006	6	85.75	26.4	98.82	18	101	100.98	194462	7455	4503581	53.5	104.92
2006	7	88.45	21.4	98.91	18.1	100.38	100.53	205215	10914	4640259	49.7	104.79
2006	8	87.74	19	98.98	18.1	100.25	100.07	210834	11622	4614801	47	104.45
2006	9	81.41	19.2	99.24	20.1	100.34	100.5	199979	9173	5078361	43	104.45
2006	10	79.74	19	98.84	21.1	101.46	101.3	209425	7633	4172665	43.5	104.4
2006	11	85.7	18.7	97.47	20.8	101.95	101.36	190715	6424	4955237	42.1	104.07
2006	12	90	22	99.4	21	103.4	102.46			5186632	36.5	104.61
2007	1	82.41			26.2	102.97	102.27	198901	4909	4482993		104.5
2007	2	69.85	18.1	96.7	34.7	102.7	100.92	211155	6689	4449278	44.6	103.96
2007	3	79.65	15.3	96.8	32.3	104.59	103.77	191700	7172	4423311	54	104.08
2007	4	78.77	19.3	97.2	33.5	103.95	102.82	201408	6504	5465298	42.1	103.78
2007	5	77.42	19.1	97.7	35.4	105.1	103.2	226408	8242	5502839	37.7	103.65
2007	6	86	28.7	96.7	36.1	107.06	104.7	222154	6608	5414922	32.9	103.03
2007	7	97.36	18.5	97.8	36.1	109.39	105.4	230626	9844	6141220	33.5	102.94
2007	8	91.87	20.7	97.8	36.5	110.53	106.86	238335	11277	5944090	35.7	103.45
2007	9	97.86	24.5	98.5	37.4	109.2	105.98	234123	6840	5335076	40	104.1
2007	10	91.98	19.5	99.5	37.5	108.46	105.73	242294	6842	5524662	40.9	105.07
2007	11	98.08	18.6	99.1	37.4	110.4	106.96	230751	4796	6117827	39.8	106.66
2007	12	102.56	13.8	100.3	32.3	110.3	106.73			6336637	39	108.08
2008	1	106.37			51.7	110.73	106.52	227197	4479	6137086		109.82
2008	2	87.62	17.7	97.5	39.7	111.36	108.4	249031	6328	5055134	51	109.55
2008	3	105.45	20.3	97.2	36.99	109.73	106.53	228746	5460	6722704	72.6	112.71
2008	4	98.78	19.5	97.3	34.3	109.15	107.26	234545	5710	6464130	54.6	112.53
2008	5	96.59	20.7	98.3	33.6	107.7	106.68	248527	5916	6403167	46.7	112.69
2008	6	95.57	20.2	97.1	32.8	106.24	105.8	232789	5696	7346104	57.5	114.39
2008	7	99.02	16.5	98.6	30.6	105.09	104.64	259282	8716	7826399	49.9	115.9
2008	8	104.02	17.1	97.1	29.1	103.45	103.47	269381	10318	9107958	49.6	116.52
2008	9	87.84	16.9	96.8	29.3	103.74	102.81	266498	8718	8412677	45.9	113.27
2008	10	81.56	15	98	27.1	102.82	102.16	278696	6639	6962336	43.4	110.4
2008	11	78.41	9.1	97.2	25.6	99.57	99.69	258743	5129	6404976	39.7	103.3
2008	12	88.99	9	97.7	25.2	98.03	98.95			5480035	35.1	99.46
2009	1	84.15			4.5	98.58	99.43	243328	5033	4470131		95.62
2009	2	80.02	13.3	94.7	8.1	98.24	98.49	255037	5560	4008011	89.4	94.9
2009	3	89.45	14	96	9.4	98.37	97.9	266911	4559	4426228	44.4	93.13
2009	4	87.54	12	96.9	8.3	99.31	98.49	258463	4673	4644273	42.8	92.14
2009	5	86.74	14.5	98	9.8	99.71	99.45	290445	4631	4911716	38.7	91.04
2009	6	87.93	14.1	96.3	13.8	99.6	99.13			6070899	29.8	90.49
2009	7	99.73	15	98.5	12.8	99.51	100.05			6111371	29	90.04
2009	8	108.2	15.6	98.3	13.9	99.95	100.22			5811281	28.3	90.9
2009	9	96.99	16.6	98.5	12.7	100.91	101.38			7530516	26.2	91.98
2009	10	103.1	20.4	98.4	12.2	101.97	100.95			5436224	25.5	93.71
2009	11	107.38	21	97.9	13.4	103.44	101.89			7455138	24.7	100.15
2009	12	110.28	21.4	100	17.3	104.25	102.91			8794170	22.4	104.24
2010	1	110.88			25.6	103.88	102.92			7845552		105.81
2010	2	87.31	21.1	94.8	26.4	103.88	102.15			6902427	46.2	106.68
2010	3	114.2	21.2	98.1	26.4	103.43	102.15			7548242	46.4	109.39
2010	4	106.6	19	99.1	33	103.66	102.01	307797	4285	7985522	33.9	110.09
2010	5	101.57	18.7	97.9	32	103.23	101	316933	4778	7580033	35.3	110.91
2010	6	108.7	18.1	96.9	32	102.99	101.06	347823	4984	8016760	37.1	109.39
2010	7	114.4	16.4	97.5	31.2	103.11	101.66	322486	8832	7991058	36.2	107.27
2010	8	105	16.5	97.6	30.1	104.23	103.09	323107	9569	8175012	35	105.2
2010	9	103.4	17.4	98.6	29.9	103.81	102.67	332142	8153	8485112	33.6	105.41
2010	10	104.64	16.4	97.9	30	104.54	104.19	357015	4611	7171133	31.6	105.76
2010	11	111.4	15.9	97.1	29.5	105.95	105.99	319966	2938	8589107	30.3	106.67
2010	12	112.4	18.9	99.1	26	105.67	104.87			8826127	28.3	106.58
2011	1	117.48			38.5	104.81	104.29	309064	3913	9568223		106.58
2011	2	94.89	14.5	98.7	38.1	104.43	104.66	317152	5331	6538480	25.5	107.13
2011	3	123.7	13.5	97.7	40.1	105.07	104.78	355920	4402	9957292	28.5	107.35
2011	4	106.9	14.8	98.8	36.1	105.18	104.96	313075	4628	9152210	35.7	107.48
2011	5	111.6	15.7	98.5	37.9	106.56	105.54	350716	5151	9062397	38.1	107.43
2011	6	115.1	16.8	97.2	37	107.92	106.55	388946	5170	9551101	38.6	107.61
2011	7	118.5	13.6	98	35.8	107.98	106.42	336523	9770	10082400	39.5	107.75
2011	8	128.8	14	98.3	34.7	106.84	105.36	338652	10500	9956308	39	107.39
2011	9	109	14	98.6	33.4	106.46	105.82	342576	9094	9664001	38.4	106.85
2011	10	107.7	13.8	97.9	33.1	104.97	105.3	358774	5411	9742011	39.3	105.64
2011	11	114.4	12.7	97.7	31.8	103.2	103.7	290677	3546	11002663	38.2	103.98
2011	12	117.6	16.1	99.6	31.7	102.97	103.77			8592910	37.6	103.24
2012	1	110.87			15.5	103.55	104.53	335407	5127	9980368		102.54
2012	2	107.7	15.8	98.8	19.2	102.19	103.06	333851	4974	9881561	23.8	101.97
2012	3	124.9	10.9	97.5	23.8	102.47	103.48	378415	4411	10540522	31	101.77
2012	4	118.8	9.9	97.2	22.3	102.42	103.16	343338	5451	9670141	22.4	101.27
2012	5	121.3	8.1	97.2	21.1	101.51	102.92	369738	5529	9634796	18.8	100.44
2012	6	133.2	9.7	96.6	21.4	101.26	102.41	408263	5987	9831785	15.3	99.46
2012	7	125.9	9.8	99.8	19.9	101.59	102.49	358838	10626	10153749	13.8	98.42
2012	8	119.9	8.6	98.1	19.7	102.25	102.83	370512	10991	9370820	13.7	98.04
2012	9	100.5	9.5	96.2	22.8	102.3	102.59	373613	9149	8798489	13.5	97.93
2012	10	106.5	9.6	98.9	21.6	103.02	102.53	380806	5435	9020740	15.7	98.62
2012	11	117.1	11	97.2	19.8	103.29	102.46	316202	3830	10548424	16.8	99.39
2012	12	129.4	11.8	99.8	17.4	103.82	102.71			10420747	16.2	99.72
2013	1				9.7	103.38	102.36	347949	3378	10706217		99.77
2013	2				7	104.64	104.07	351251	4775	8367101	18.5	99.71
2013	3	120.59	10.5	97.4	10.4	103.49	102.67	390294	3625	10493774	20.2	99.48
2013	4	116.77	10.8	97.3	6.9	103.34	102.69	352094	4250	10178549	23.6	98.37
2013	5	115.56	10.4	97.9	5.2	102.89	102.37	393747	4406	10621125	30	97.9
2013	6	117.5	9.8	98	5.7	102.32	102.46	429366	5105	9004135	21.4	98.01
2013	7	135.45	7.5	98.6	6.5	101.62	102.24	371021	8637	9795764	23.8	98.79
2013	8	130.75	7.6	98.8	7	101.13	101.42	387060	11441	10134811	22.2	99.27
2013	9	128	7.5	97.7	7.8	101.8	102.34	390577	8987	9959765	24.6	99.64
2013	10	123.95	9.3	97.3	9	101.65	102.38	397135	5678	9304366	21.6	99.36
2013	11	127.33	8.8	96.7	10.7	101.84	102.45	329173	3476	11735899	19.8	99
2013	12	139.35	8.7	97.4		101.28	101.65			10353339	17.8	98.79
2014	1				4.8	100.8	101.6	262080	3634	12446142		98.6
2014	2	119.06			8.4	100.07	100.8	290099	4780	8044592	26.5	98.04
2014	3	131.61	8.7	96.2	9.3	101.07	101.76	281762	3544	10003471	25.9	97.55
2014	4	119.22	8.2	98.4	9.2	101.07	101.78	291181	4346	9558144	23.1	97.93
2014	5	125.82	8.6	98.1	8.4	102.26	102.8	323821	4778	11471482	8.9	98.71
2014	6	137.68	8	96.7	6.3	102.19	102.33	332141	4977	10303009	7.1	99.29
2014	7	144.04	8.2	97.9	4.3	102.3	102.22	345699	8518	9709417	1.2	99.47
2014	8	156.36	2.8	98.4	2.4	102.16	102.18	374283	11668	12116052	-2.7	98.98
2014	9	129.96	-1.6	98.4	-3.2	101.45	101.32	356378	7980	10849961	-10.4	98.18
2014	10	124.16	-2	98.2	-5.8	101.32	101.42	338940	5157	9915810	-13	97.6
2014	11	127.79	-2.5	97.3	-6.8	100.88	101.26	280753	3112	9928712	-15.9	97.17
2014	12	142.58	-4.9	98.1		101.05	101.8			10773982	-17.6	96.46
2015	1				-13.4	100.42	100.68	267021	3579	9440943		95.27
2015	2	112.26			-17.9	101.24	101.75	296049	4046	7503008	-2.4	94.62
2015	3	123.08	-8.5		-32.7	101.09	101.38	288814	3775	8849024	-20.2	94.66
2015	4	121.42	-6.8	97.8	-27	101.32	101.3	296723	3896	9489233	-23.4	94.38
2015	5	131.48	-6.1	97.6	-23.9	100.79	100.66	329940	4471	8297601	-23.3	94.77
2015	6	132.02	-5.2	97.8	-22.7	100.89	101.02	337667	4128	8869374	-25.9	94.51
2015	7	152.53	-4.9	98.4	-21.7	101.52	101.68	351736	7511	9945066	-24.1	93.92
2015	8	163.44	-4	98.4	-22.9	101.75	101.97	379165	10679	8227533	-24.1	92.94
2015	9	147.44	-7.6	99	-27.4	101.97	101.72	371385	6958	9825931	-26.4	92.78
2015	10	128.31	-13.3	99.3	-31.2	101.56	101.1	347450	4805	7654388	-28.6	93
2015	11	134.2	-11.8	98.5	-31.7	101.87	101.79	288471	2982	9165207	-31.1	93.2
2015	12	144.45	-12.7	98.6		102.11	101.52			10151418	-32.3	93.3
2016	1					101.95	101.36	212922	3661	7144725		94.1
2016	2				-11.26	102.45	101.63	235656	4028	5930901	-8.3	94.3
2016	3	130.04	-6.1	97.5	-12.55	102.1	101.87	230625	3910	7970648	-8.1	95.2
2016	4	127.4	-9.8	98.3	-6.84	101.79	101.89	237341	4222	7896514	-14.9	96.61
2016	5	129.4	-7.1	98.5	-8.99	101.88	101.62	265873	3934	8072195	-23.4	97.4
2016	6	143.9	-7.8	97	-18.04	101.84	101.34	271753	4018	8372351	-33.1	97.8
2016	7	160.9	-9.7	97.3	-16.58	101.27	101.19	281559	7581	8209061	-37.3	98.4
2016	8	162.9	-12.7	99	-13.92	100.99	100.86	302927	11010	8216152	-39.5	99.8
2016	9	154.6	-18.9	99	-13.92	101.65	101.81	296755	7016	9173536	-40.9	100.9
2016	10	148.5	-23.8	100.2	0.87	101.71	101.71	277599	5263	7216153	-42.2	101.8
2016	11	148	-17.3	99.5	2.56	101.78	101.49	229773	2935	8851141	-42.3	103.4
2016	12	154.5	-10	100.2		101.79	101.63	224248	2387	9358383	-42.2	106.2
2017	1				19.72	102.59	102.22	209050	3918	9020375		108.7
2017	2				16.08	101.2	100.52	230268	4432	8222793	-6.5	109.9
2017	3	146.5	-4.9	96.5	13.53	101.03	100.41	224442	3463	9645315	-11.8	109.9
2017	4	123.4	-5.3	99.4	9.54	100.99	100.62	231331	3904	9060080	-18.3	108.1
2017	5	124.1	-6.4	100.7	9.27	100.59	100.65	260105	3809	9150558	-21.6	106.4
2017	6	154.1	-2.4	97.6	8.57	100.45	100.96	264696	3842	9111197	-17.7	106.2
2017	7	168.2	-1.6	97.4	9.43	100.45	100.96	273966	7319	9749796	-13.6	106.3
2017	8	170.4	1.9	100	9.55	100.9	101.23	295000	12943	9311367	-7.2	107.4
2017	9	151.5	4	98.8	10.76	100.75	101.91	289911	6894	9437483	0	108.8
2017	10	155.9	7.7	99.3	10.41	101.19	102.38	270907	5013	8351815	6.2	109.4
2017	11	155.5	7.5	99.1	10.28	101.28	102.62	223427	2651	10132668	10.3	108.9
2017	12	170	9.8	102.3		101.44	102.45	215440	2179	10593708	11.2	107.6
